# Supplementary material for: Radionuclide Delivery Strategies in Tumor Treatment: A Systematic Review
Source: MDPI journal article supplement (doi:10.3390/cimb44080225), 2022-07-22
Supplement: s1 [file s1]

Table S1. Critical Appraisal Skills Program (CASP) checklist.

[illegible]

|                                                                     |    |     |     |     |     |     |     |     |     |     |     |     |     |
|---------------------------------------------------------------------|----|-----|-----|-----|-----|-----|-----|-----|-----|-----|-----|-----|-----|
| 8. How precise are the results?                                     | GP | HIG | MED | HIG | MED | HIG | MED | MED | LOW | LOW | HIG | HIG | MED |
|                                                                     | LE | HIG | MED | HIG | MED | HIG | MED | MED | LOW | LOW | HIG | HIG | MED |
|                                                                     | AG |     |     |     |     |     |     |     |     |     |     |     |     |
| 9. Do you believe the results?                                      | GP | Y   | Y   | Y   | Y   | Y   | Y   | Y   | Y   | Y   | Y   | Y   | Y   |
|                                                                     | LE | Y   | Y   | Y   | Y   | Y   | Y   | Y   | Y   | Y   | Y   | Y   | Y   |
|                                                                     | AG |     |     |     |     |     |     |     |     |     |     |     |     |
| 10. Can the results be applied to the local population?             | GP | CT  | Y   |
|                                                                     | LE | CT  | CT  | CT  | CT  | Y   | CT  | CT  | CT  | CT  | CT  | CT  | Y   |
|                                                                     | AG |     |     |     |     | Y   |     |     |     |     |     |     |     |
| 11. Do the results of this study fit with other available evidence? | GP | CT  | Y   | N   | CT  | N   | N   | N   | Y   | CT  | CT  | Y   | Y   |
|                                                                     | LE | CT  | Y   | N   | N   | N   | N   | N   | Y   | N   | N   | Y   | Y   |
|                                                                     | AG |     |     |     | N   |     |     |     |     | N   | N   |     |     |
| 12. What are the implications of this study for practice?           | GP | CT  | CT  | CT  | CT  | CT  | CT  | Y   | Y   | Y   | CT  | CT  | Y   |
|                                                                     | LE | CT  | CT  | CT  | CT  | CT  | CT  | Y   | Y   | Y   | CT  | CT  | Y   |
|                                                                     | AG |     |     |     |     |     |     |     |     |     |     |     |     |

GP: Giulia Poletto; LE: Laura Evangelista; AG: agree; Y: yes; N: No, CT: can't tell; CLR: clear; MED: medium; HIG: high
